# Supplementary material
Source: PubMed Central journal article supplement (PMC1088357)

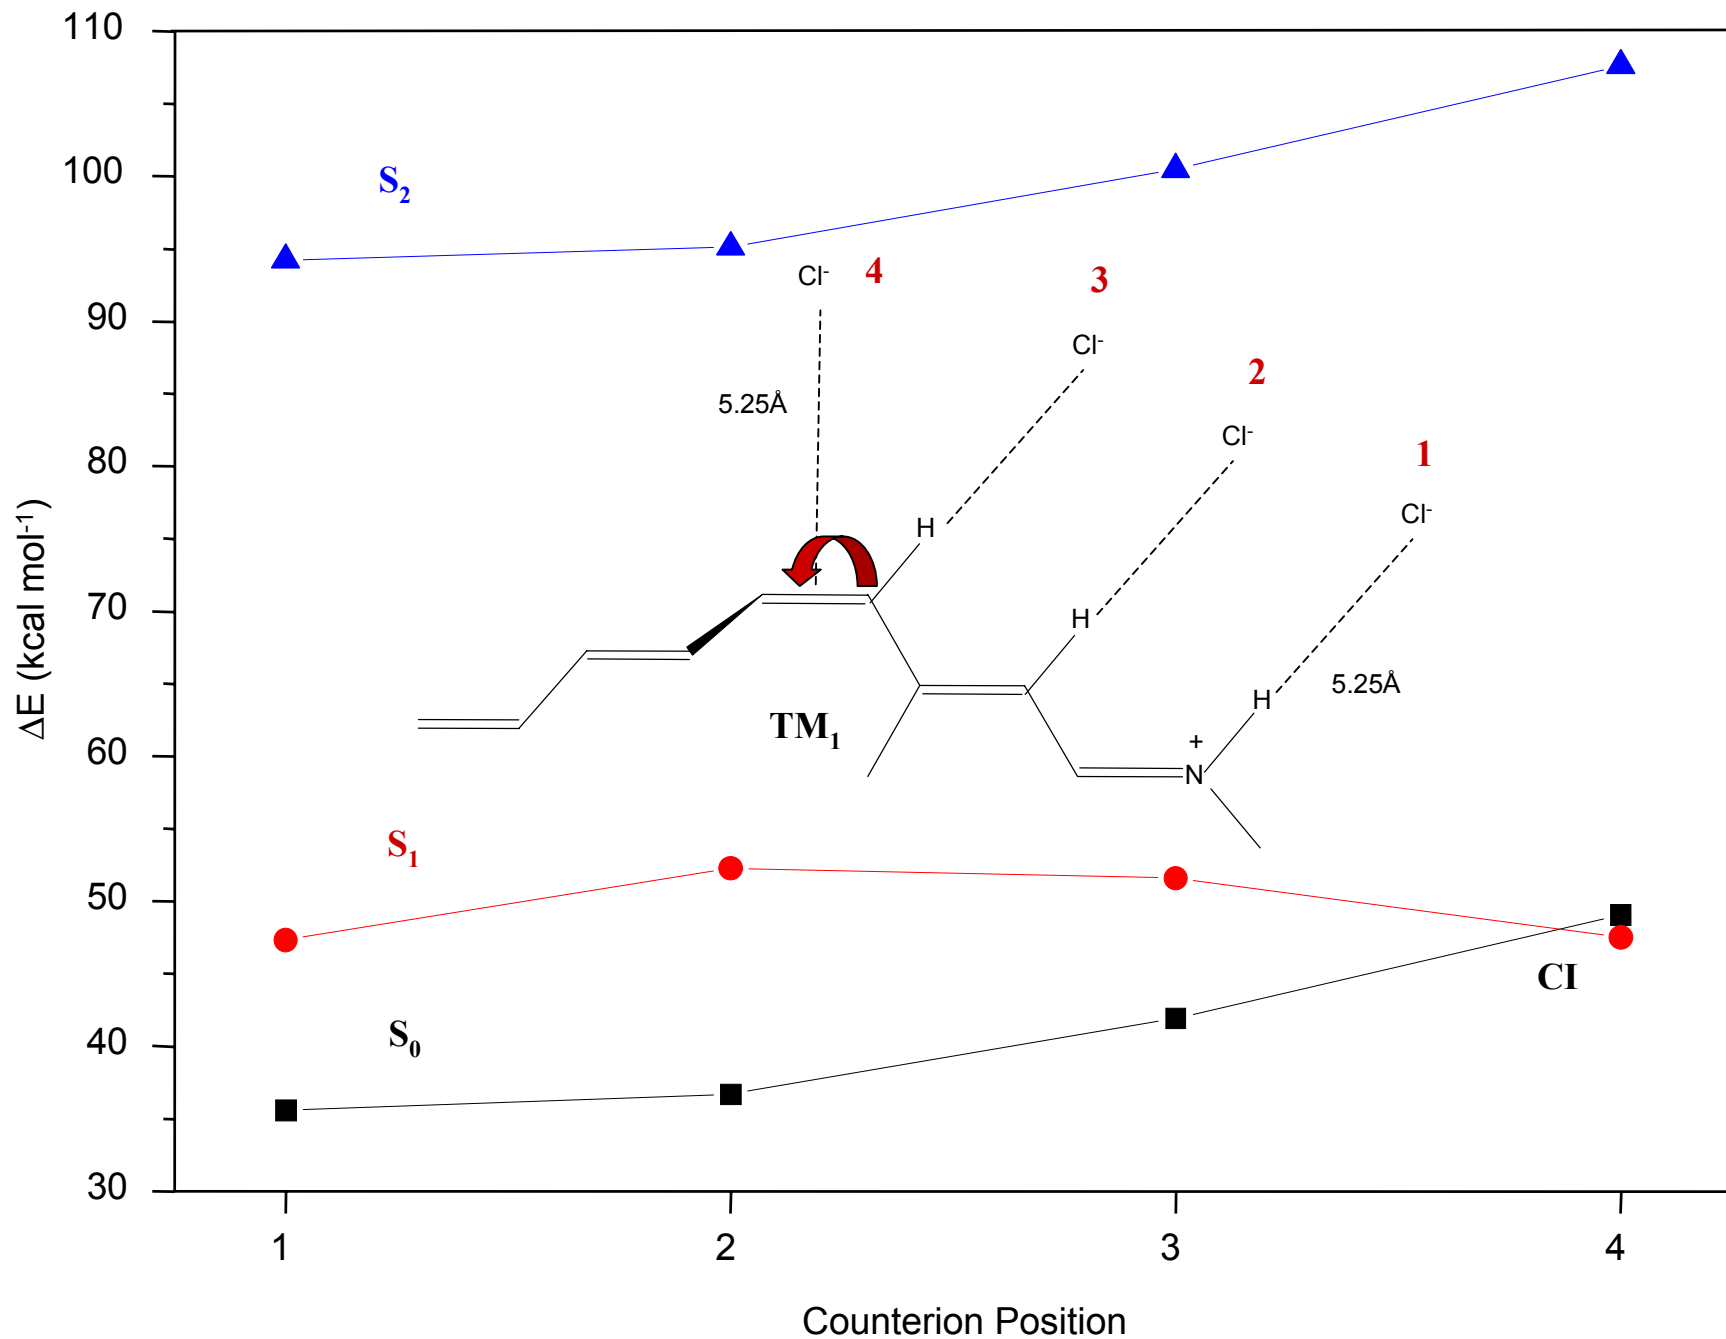

a

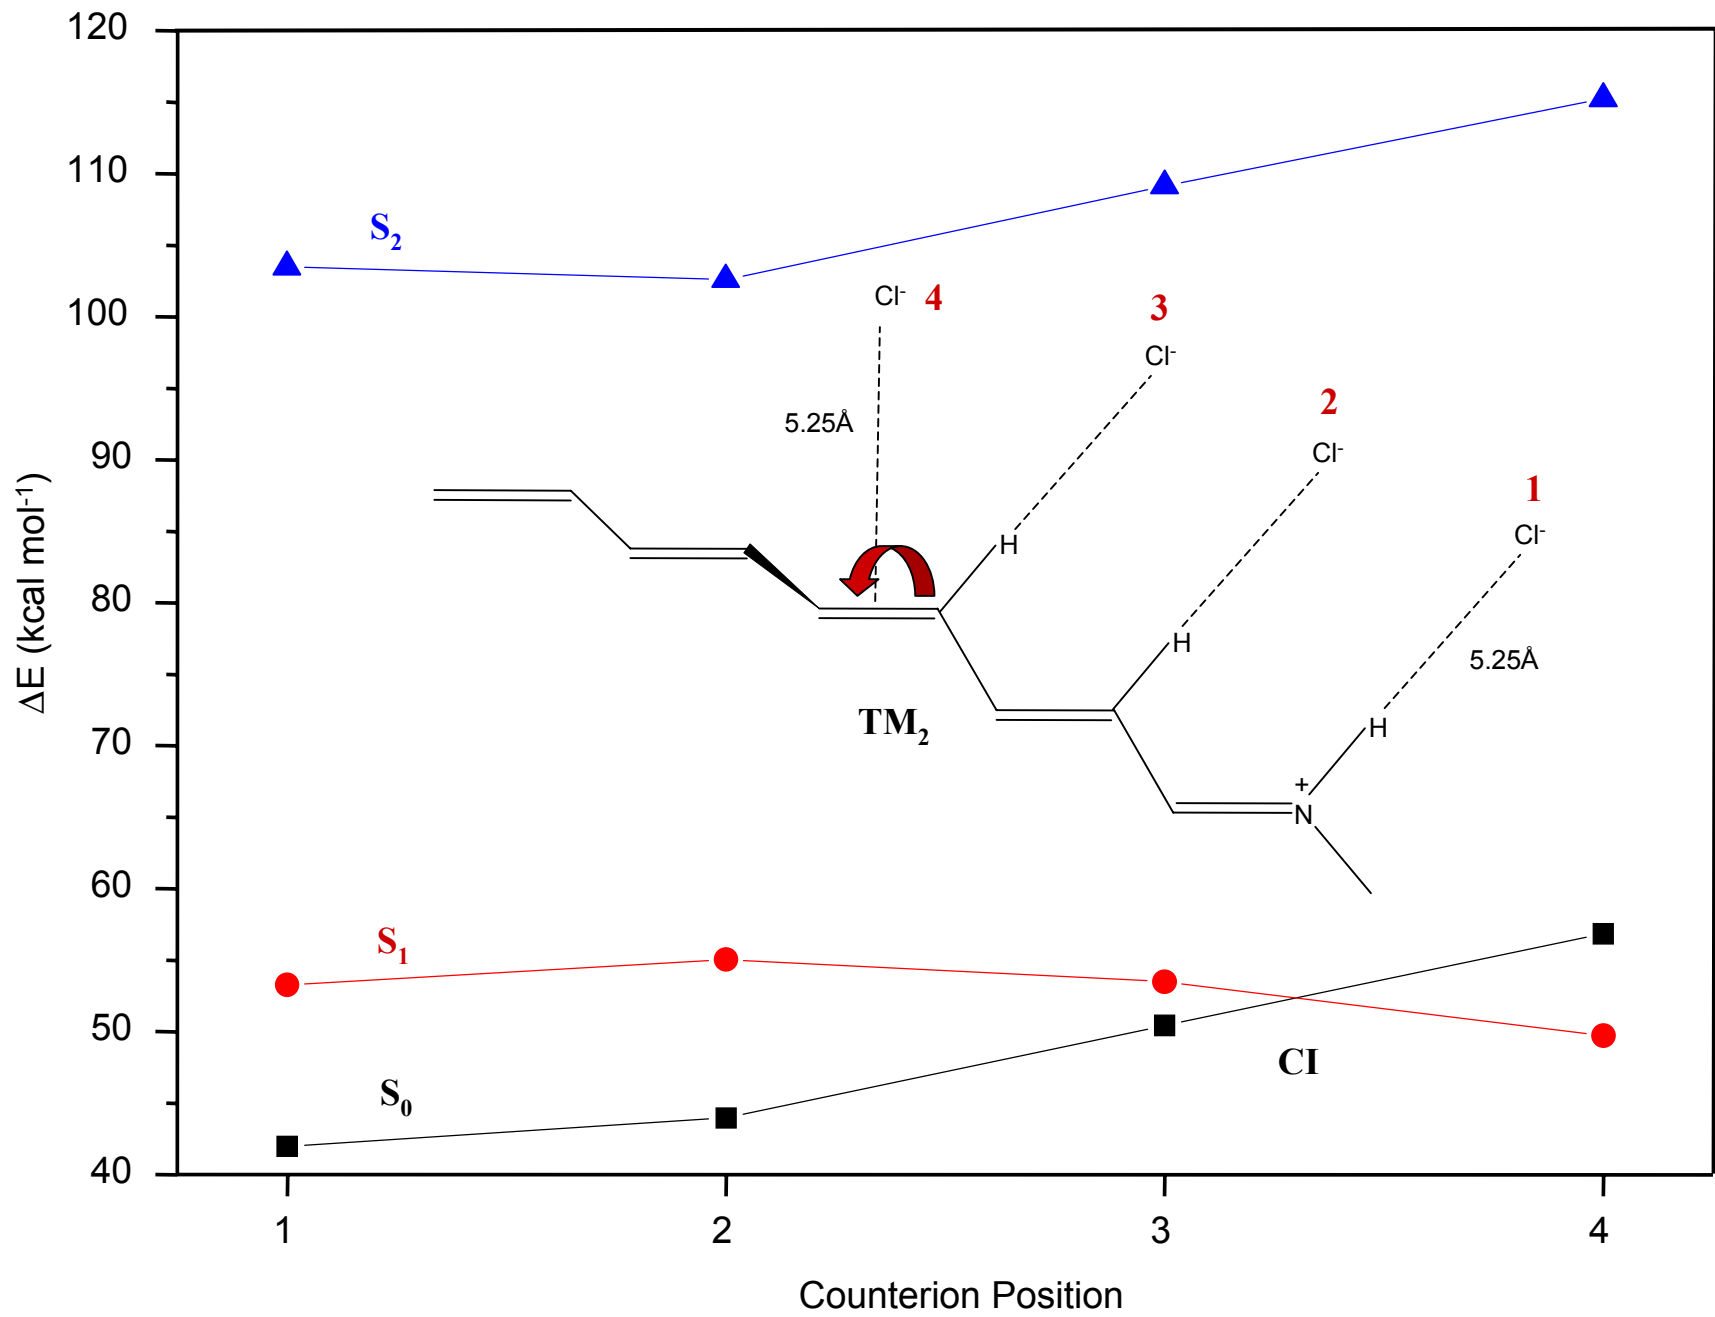

b

Supplement: pnas_102_18_6255__2.pdf [file pnas_102_18_6255__2.pdf]

(a)

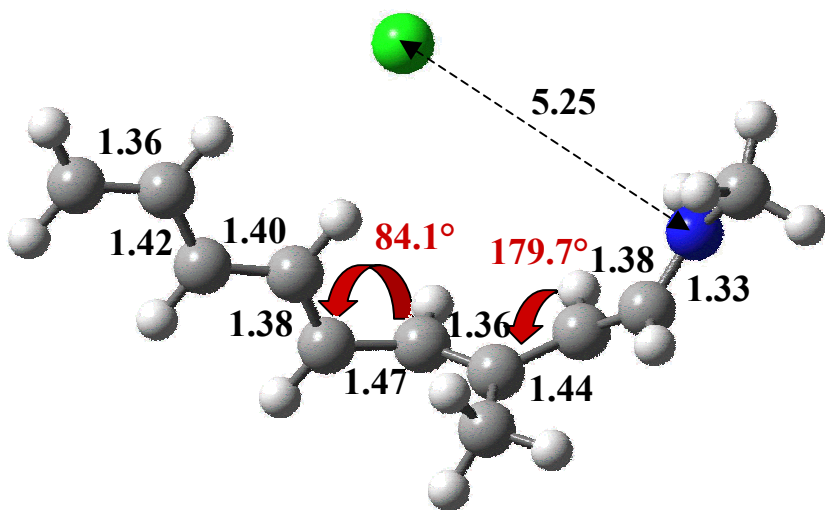

CI

(b)

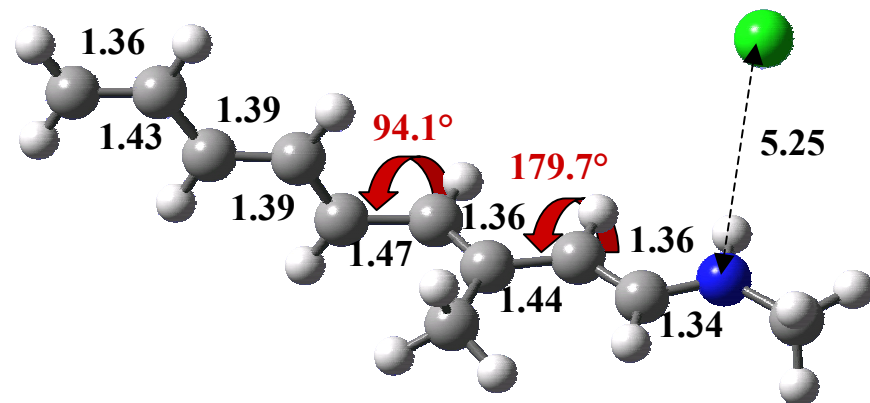

TM<sub>1</sub>

Supplement: pnas_102_18_6255__3.pdf [file pnas_102_18_6255__3.pdf]
